# Supplementary material
Source: publisher figshare collection journal article supplement (https://acs.figshare.com/ndownloader/files/22880441)
Supplement: Supplementary file 1 [file 22880441]

## Supporting Information

### Dual peptide-based gene delivery system for the efficient transfection of plant callus cells

*Takaaki Miyamoto<sup>†</sup>, Kousuke Tsuchiya<sup>†\*</sup>, Keiji Numata<sup>†‡\*</sup>*

<sup>†</sup>Biomacromolecules Research Team, RIKEN Center for Sustainable Resource Science, 2-1 Hirosawa, Wako-shi, Saitama 351-0198, Japan

<sup>‡</sup>Department of Material Chemistry, Graduate School of Engineering, Kyoto University, Kyoto-Daigaku-Katsura, Nishikyo-ku, Kyoto 615-8510, Japan.

## Contents

### Supplementary figures

|                   |                                                                                                                                                         |       |
|-------------------|---------------------------------------------------------------------------------------------------------------------------------------------------------|-------|
| <b>Figure. S1</b> | Electrophoretic mobility of the naked pDNA, the BP100-(KH) <sub>9</sub> /pDNA complex, or the BP100-(KH) <sub>9</sub> /pDNA complex with dTat-Sar-EED4. | p. S2 |
| <b>Figure. S2</b> | Effect of Cy3 (a fluorescent dye)-labeling of pDNA and presence of mannitol on the formation of the BP100-(KH) <sub>9</sub> /pDNA complex.              | p. S3 |
| <b>Figure. S3</b> | Physicochemical properties of the (KH) <sub>9</sub> /pDNA complex in the absence and presence of dTat-Sar-EED4.                                         | p. S4 |

Supplementary

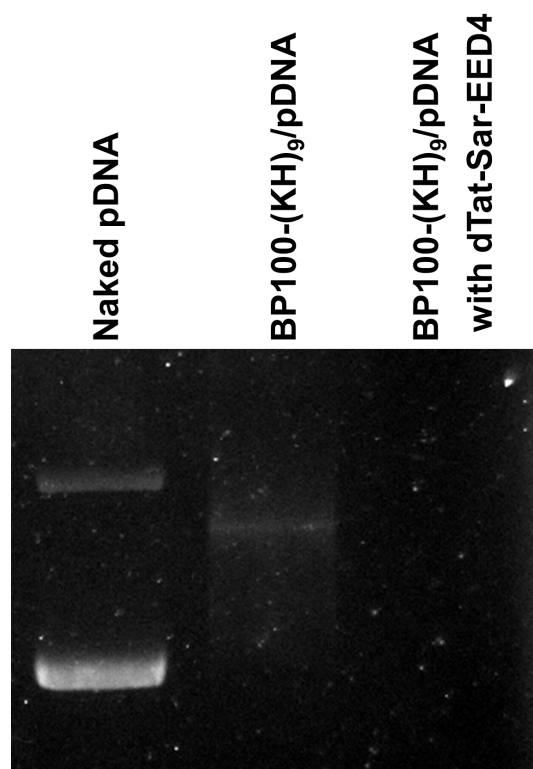

figures

**Figure S1.** Electrophoretic mobility of the naked pDNA, the BP100-(KH)<sub>9</sub>/pDNA complex (N/P =0.5), or the BP100-(KH)<sub>9</sub>/pDNA complex (N/P =0.5) with dTat-Sar-EED4.

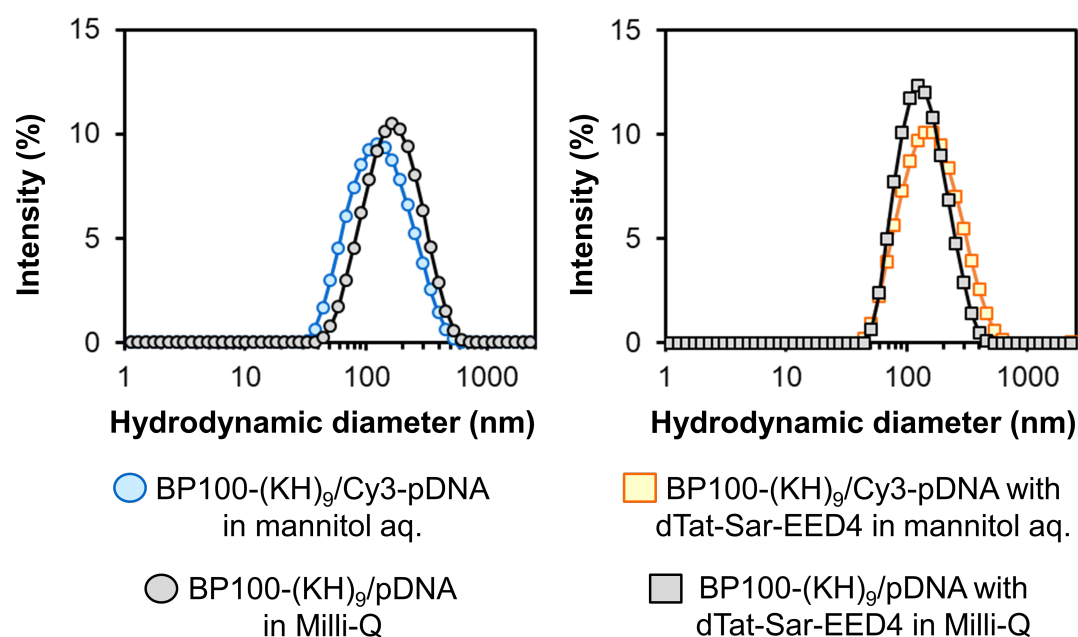

**Figure S2.** Effect of Cy3 (a fluorescent dye)-labeling of pDNA and presence of mannitol on the formation of the BP100-(KH)<sub>9</sub>/pDNA complex. In the absence and presence of dTat-Sar-EED4 (96  $\mu$ M), DLS measurements were performed three times for the labeled (BP100-(KH)<sub>9</sub>/Cy3-pDNA (N/P =0.5)) complex in 0.4 M mannitol aqueous solution, or for the unlabeled (BP100-(KH)<sub>9</sub>/pDNA (N/P =0.5)) complex in Milli-Q water. The mean hydrodynamic diameter and PDI of each system were as follow: the labeled complex in mannitol aq., 145 nm and 0.279; the unlabeled complex in Milli-Q, 160 nm and 0.211; the labeled complex with dTat-Sar-EED4 in mannitol aq., 119 nm and 0.257; the unlabeled complex with dTat-Sar-EED4 in Milli-Q, 130 nm and 0.240.

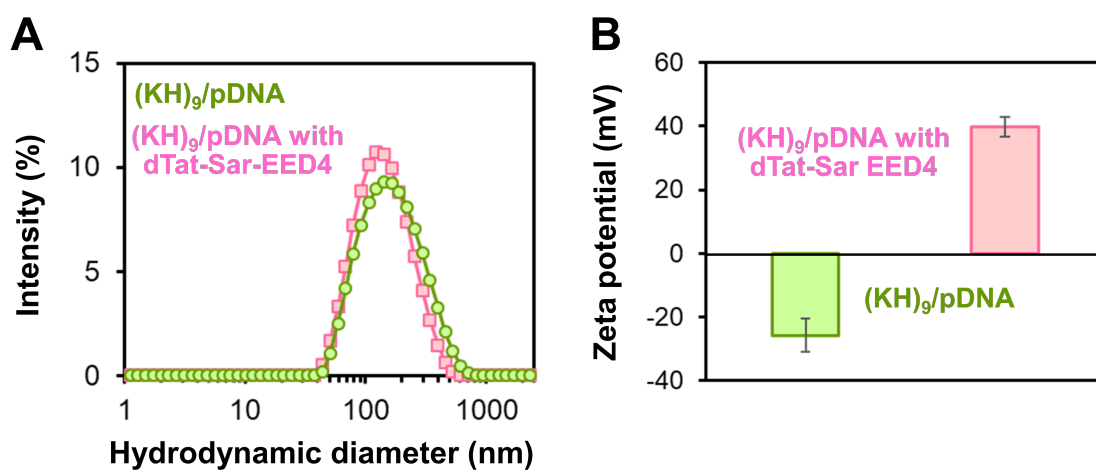

**Figure S3.** Physicochemical properties of the (KH)<sub>9</sub>/pDNA complex (N/P = 0.5) in the absence and presence of dTat-Sar-EED4 (96  $\mu$ M). (A) Representative size distributions and (B) zeta potentials of the complexes. Error bars represent standard deviations ( $n = 3$ ). The mean hydrodynamic diameter, PDI, and zeta potential of each system were as follow: (KH)<sub>9</sub>/pDNA, 147 nm, 0.229, and -26 mV; (KH)<sub>9</sub>/pDNA with dTat-Sar-EED4, 128 nm, 0.238, and 40 mV.
